# Supplementary material
Source: Springer Nature journal article supplement (https://www.springermedizin.de/resource/supplementary/13020_2010_95_MOESM3_ESM.pdf/9640972)
Supplement: MOESM3 [file 9640972]

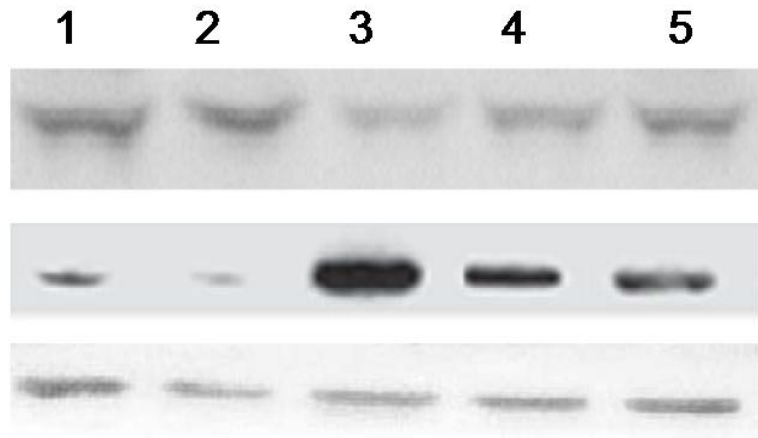

GABA<sub>A</sub>R $\alpha$ 1

GABA<sub>A</sub>R $\alpha$ 4

$\beta$ -actin

1: Saline+saline

2: Saline+puerarin

3: Alcohol+saline

4: Alcohol+puerarin

5: Puerarin+alcohol
